# Supplementary material for: Integrated Approach for Synthetic Cathinone Drug Prioritization and Risk Assessment: In Silico Approach and Sub-Chronic Studies in Daphnia magna and Tetrahymena thermophila
Source: MDPI journal article supplement (doi:10.3390/molecules28072899), 2023-03-23
Supplement: s1 [file s1]

# Integrated Approach for Synthetic Cathinone Drug Prioritization and Risk Assessment: In Silico Approach and Sub-Chronic Studies in *Daphnia magna* and *Tetrahymena thermophila*

Ariana Pérez-Pereira <sup>1,2</sup>, Ana Rita Carvalho <sup>1</sup>, João Soares Carrola <sup>2,3</sup>, Maria Elizabeth Tiritan <sup>1,4,5,\*</sup> and Cláudia Ribeiro <sup>1,\*</sup>

<sup>1</sup> TOXRUN—Toxicology Research Unit, University Institute of Health Sciences, IUCS-CESPU, CRL, 4585-116 Gandra, Portugal

<sup>2</sup> Department of Biology and Environment, University of Trás-os-Montes and Alto Douro (UTAD), CITAB, 5000-801 Vila Real, Portugal

<sup>3</sup> Inov4Agro—Institute for Innovation, Capacity Building and Sustainability of Agri-Food Production, 5000-801 Vila Real, Portugal

<sup>4</sup> Interdisciplinary Center of Marine and Environmental Research (CIIMAR), University of Porto, Edifício do Terminal de Cruzeiros do Porto de Leixões, 4450-208 Matosinhos, Portugal

<sup>5</sup> Laboratory of Organic and Pharmaceutical Chemistry, Department of Chemical Sciences, Faculty of Pharmacy, University of Porto, 4050-313 Porto, Portugal

\* Correspondence: elizabeth.tiritan@iucs.cespu.pt (M.E.T.); claudia.ribeiro@iucs.cespu.pt (C.R.)

## 1. RESULTS AND DISCUSSIONS

### 1.1. In silico studies

**Table S1** presents the Chemical Abstracts Service (CAS) registry numbers, the Simplified Molecular Input Line Entry System (SMILES) notations and the polar surface area (PSA) value for each of the 44 SC obtained through the PubChem online platform. The 44 SC were divided into the following seven groups considering PSA values (ranged from 20.3 to 57.3 Å<sup>2</sup>): 20.3 Å<sup>2</sup> for

(S)-MTFP ((S)-metamfepramone or *N,N*-dimethylcathinone), MPP, 4-MPBP (4-methyl- $\alpha$ -pyrrolizinobutyrophenone), NPP (naphthylpyrovalerone or naphyrone),  $\alpha$ -PVP ( $\alpha$ -pyrrolidinovalerophenone), 5-PPDI (indanyl- $\alpha$ -pyrrolidinobutiophenone), 4-BrPVP (4-bromo- $\alpha$ -pyrrolidinopentiophenone), 4-FPHP (4-fluoro- $\alpha$ -pyrrolidinohexanophenone), DMP (dimethylpentedrone),  $\alpha$ -PHP ( $\alpha$ -pyrrolidinohexanophenone) and  $\alpha$ -PIHP ( $\alpha$ -pyrrolidinoisohexanophenone); 29.1 Å<sup>2</sup> for 3,4-DMMC, 3-MMC, BPD, 4-MMC, EPH, EPP (ethcathinone), TBCP (bupropion or amfebutamone), 4-MEC (4-methylethcathinone), 4-FMC (4-fluoromethcathinone or flephedrone), 3-FMC (3-fluoromethcathinone or 3-flephedrone), 4-MPD (4-methylpentedrone),  $\alpha$ -BHP ( $\alpha$ -butylaminohexanophenone), 4-BMC (4-bromomethcathinone or brephedrone), MPH (hexedrone), 2,4-DMEC (2,4-dimethylethcathinone), 2,4-DMMC (2,4-dimethylmethcathinone or 2-methylmephedrone), BMAPN (2-(methylamino)-1-(naphthalen-2-yl)propan-1-one),  $\alpha$ -PPP ( $\alpha$ -propylaminopentiophenone or *N*-propylpentedrone) and PTD; 29.5 Å<sup>2</sup> for 4-MeO- $\alpha$ -PHPP (4-methoxy- $\alpha$ -pyrrolidinoheptanophenone), 4-MeO- $\alpha$ -POP (4-methoxy- $\alpha$ -pyrrolidinooctanophenone) and 4-MeO- $\alpha$ -PVP (4-methoxy- $\alpha$ -pyrrolidinovalerophenone); 38.8 Å<sup>2</sup> for MDPV, MDPBP (3,4-methylenedioxy- $\alpha$ -pyrrolidinobutyrophenone) and 3,4-DMPVP (3,4-dimethoxy- $\alpha$ -pyrrolidinopentiophenone); 43.1 Å<sup>2</sup> for CATH; 47.6 Å<sup>2</sup> for BTL, bk-MDEA (ethylone), bk-EBDB (eutylone), bk-MAP, bk-EBDP (*N*-ethylpentylone) and bk-MBDP (pentylone); and 57.3 Å<sup>2</sup> for MTP (thiothinone).

**Table S1:** Acronym, International Union of Pure and Applied Chemistry (IUPAC) name, Chemical Abstracts Service (CAS) number, chemical structure, Simplified Molecular Input Line Entry System (SMILES) notation and polar surface area (PSA) value of 44 SC for *in silico* studies.

| SC<br>(IUPAC name)                                                                                 | Acronym | CAS number  | Structure                                                                           | SMILES                                            | Topological polar<br>surface area<br>(PSA; Å <sup>2</sup> ) |
|----------------------------------------------------------------------------------------------------|---------|-------------|-------------------------------------------------------------------------------------|---------------------------------------------------|-------------------------------------------------------------|
| <b>Cathinone or norephedrone</b><br>((2S)-2-(Amino)-1-(phenyl)propan-1-one)                        | CATH    | 71031-15-7  | 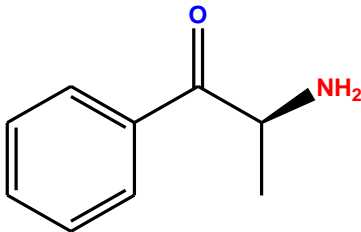 | <chem>CC(C(=O)C1=CC=CC=C1)N</chem>                | 43.1                                                        |
| <b>Butylone</b><br>(1-(1,3-Benzodioxol-5-yl)-2-(methylamino)butan-1-one)                           | BTL     | 802575-11-7 |   | <chem>CCC(C(=O)C1=CC2=C(C=C1)OCO2)NC</chem>       | 47.6                                                        |
| <b>3,4-Methylenedioxypyrovalerone</b><br>(1-(1,3-Benzodioxol-5-yl)-2-(1-pyrrolidinyl)pentan-1-one) | MDPV    | 687603-66-3 |  | <chem>CCCC(C(=O)C1=CC2=C(C=C1)OCO2)N3CCCC3</chem> | 38.8                                                        |

|                                                                                          |          |                                    |                                                                                     |                                             |      |
|------------------------------------------------------------------------------------------|----------|------------------------------------|-------------------------------------------------------------------------------------|---------------------------------------------|------|
| <b>3,4-Dimethylmethcathinone</b><br>(1-(3,4-Dimethylphenyl)-2-(methylamino)propan-1-one) | 3,4-DMMC | 1082110-00-6                       | 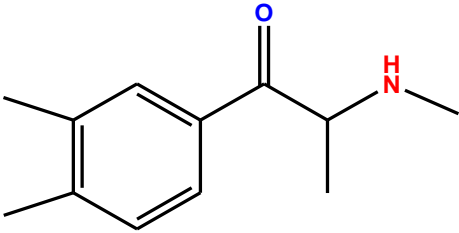  | <chem>CC1=C(C=C(C=C1)C(=O)C(C)NC)C</chem>   | 29.1 |
| <b>3-Methylmethcathinone</b><br>(2-(Methylamino)-1-(3-methylphenyl)propan-1-one)         | 3-MMC    | 1246816-62-5<br>or<br>1246911-86-3 |   | <chem>CC1=CC(=CC=C1)C(=O)C(C)NC</chem>      | 29.1 |
| <b>Buphedrone</b><br>(2-(Methylamino)-1-(phenyl)butan-1-one)                             | BPD      | 408332-79-6                        |  | <chem>CCC(C(=O)C1=CC=CC=C1)NC</chem>        | 29.1 |
| <b>Ethylone</b><br>(1-(1,3-Benzodioxol-5-yl)-2-(ethylamino)propan-1-one)                 | bk-MDEA  | 1112937-64-0                       |  | <chem>CCNC(C)C(=O)C1=CC2=C(C=C1)OCO2</chem> | 47.6 |

|                                                                                                |         |              |                                                                                     |                                              |      |
|------------------------------------------------------------------------------------------------|---------|--------------|-------------------------------------------------------------------------------------|----------------------------------------------|------|
| <b>Eutylone</b><br>(1-(1,3-Benzodioxol-5-yl)-2-(ethylamino)butan-1-one)                        | bk-EBDB | 802855-66-9  | 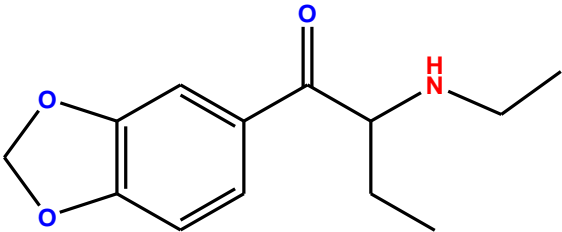  | <chem>CCC(C(=O)C1=CC2=C(C=C1)OCO2)NCC</chem> | 47.6 |
| <b>Mephedrone or 4-methylmethcathinone</b><br>(2-(Methylamino)-1-(4-methylphenyl)propan-1-one) | 4-MMC   | 1189805-46-6 |   | <chem>CC1=CC=C(C=C1)C(=O)C(C)NC</chem>       | 29.1 |
| <b>Methcathinone or ephedrone</b><br>(2-(Methylamino)-1-(phenyl)propan-1-one)                  | EPH     | 5650-44-2    |  | <chem>CC(C(=O)C1=CC=CC=C1)NC</chem>          | 29.1 |
| <b>Methylone</b><br>(1-(1,3-Benzodioxol-5-yl)-2-(methylamino)propan-1-one)                     | bk-MAP  | 186028-79-5  |  | <chem>CC(C(=O)C1=CC2=C(C=C1)OCO2)NC</chem>   | 47.6 |

|                                                                                                      |          |             |                                                                                      |                                               |      |
|------------------------------------------------------------------------------------------------------|----------|-------------|--------------------------------------------------------------------------------------|-----------------------------------------------|------|
| <b>N-Ethylpentylone</b><br>(1-(1,3-Benzodioxol-5-yl)-2-(ethylamino)pentan-1-one)                     | bk-EBDP  | 727641-67-0 | 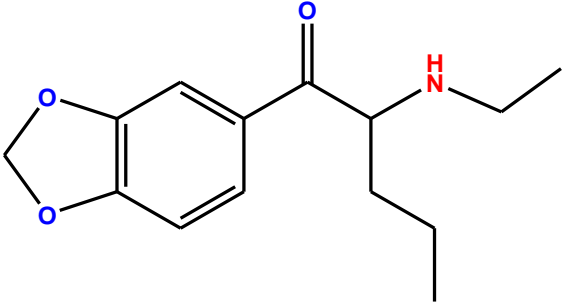   | <chem>CCCC(C(=O)C1=CC2=C(C=C1)OCO2)NCC</chem> | 47.6 |
| <b>Pentylone</b><br>(1-(1,3-Benzodioxol-5-yl)-2-(methylamino)pentan-1-one)                           | bk-MBDP  | 698963-77-8 |    | <chem>CCCC(C(=O)C1=CC2=C(C=C1)OCO2)NC</chem>  | 47.6 |
| <b>(S)-Metamfepramone or N,N-dimethylcathinone</b><br>((2S)-2-Dimethylamino)-1-(phenyl)propan-1-one) | (S)-MTFP | 35026-77-8  |  | <chem>CC(C(=O)C1=CC=CC=C1)N(C)C</chem>        | 20.3 |
| <b>Ethcathinone</b><br>(2-(Ethylamino)-1-(phenyl)propan-1-one)                                       | EPP      | 18259-37-5  |  | <chem>CCNC(C)C(=O)C1=CC=CC=C1</chem>          | 29.1 |

|                                                                                                                     |        |             |                                                                                     |                                                    |      |
|---------------------------------------------------------------------------------------------------------------------|--------|-------------|-------------------------------------------------------------------------------------|----------------------------------------------------|------|
| <b>Pyrovalerone</b><br>(1-(4-Methylphenyl)-2-(pyrrolidin-1-yl)pentan-1-one)                                         | MPP    | 3563-49-3   | 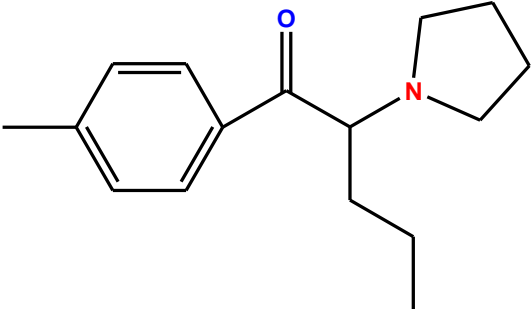  | <chem>CCCC(C(=O)C1=CC=C(C=C1)C)N2CCCC2</chem>      | 20.3 |
| <b>4-Methyl-<math>\alpha</math>-pyrrolizinobutyrophenone</b><br>(1-(4-Methylphenyl)-2-(pyrrolidin-1-yl)butan-1-one) | 4-MPBP | 732180-91-5 |   | <chem>CCC(C(=O)C1=CC=C(C=C1)C)N2CCCC2</chem>       | 20.3 |
| <b>Naphthylpyrovalerone or naphyrone</b><br>(1-(Naphthalen-2-yl)-2-(pyrrolidin-1-yl)pentan-1-one)                   | NPP    | 850352-53-3 |  | <chem>CCCC(C(=O)C1=CC2=CC=CC=C2C=C1)N3CCCC3</chem> | 20.3 |

|                                                                                                                                     |               |                                |                                                                                      |                                                   |      |
|-------------------------------------------------------------------------------------------------------------------------------------|---------------|--------------------------------|--------------------------------------------------------------------------------------|---------------------------------------------------|------|
| <b><math>\alpha</math>-Pyrrolidinovalerophenone</b><br>(1-(Phenyl)-2-(pyrrolidin-1-yl)pentan-1-one)                                 | $\alpha$ -PVP | 14530-33-7                     | 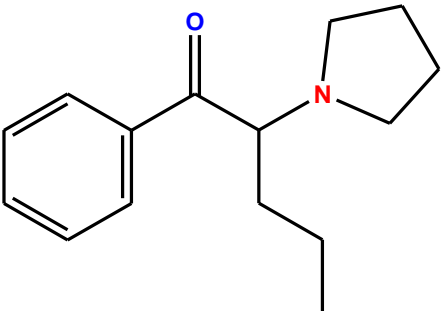  | <chem>CCCC(C(=O)C1=CC=CC=C1)N2CCCC2</chem>        | 20.3 |
| <b>3,4-Methylenedioxy-<math>\alpha</math>-pyrrolidinobutyrophenone</b><br>(1-(1,3-Benzodioxol-5-yl)-2-(pyrrolidin-1-yl)butan-1-one) | MDPBP         | 784985-33-7                    |    | <chem>CCC(C(=O)C1=CC2=C(C=C1)OCO2)N3CCCC3</chem>  | 38.8 |
| <b>Bupropion or amfebutamone</b><br>(2-(Tert-butylamino)-1-(3-chlorophenyl)propan-1-one)                                            | TBCP          | 34911-55-2<br>or<br>34841-39-9 |   | <chem>CC(C(=O)C1=CC(=CC=C1)Cl)N(C(C)(C)C)C</chem> | 29.1 |
| <b>4-Methylethcathinone</b><br>(2-(Ethylamino)-1-(4-methylphenyl)propan-1-one)                                                      | 4-MEC         | 1225617-18-4                   |  | <chem>CCNC(C)C(=O)C1=CC=C(C=C1)C</chem>           | 29.1 |



|                                                                                                   |       |              |                                                                                       |                                          |      |
|---------------------------------------------------------------------------------------------------|-------|--------------|---------------------------------------------------------------------------------------|------------------------------------------|------|
| <b>4-Fluoromethcathinone or flephedrone</b><br>(1-(4-Fluorophenyl)-2-(methylamino)propan-1-one)   | 4-FMC | 447-40-5     | 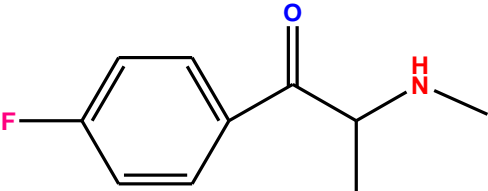    | <chem>CC(C(=O)C1=CC=C(C=C1)F)NC</chem>   | 29.1 |
| <b>3-Fluoromethcathinone or 3-flephedrone</b><br>(1-(3-Fluorophenyl)-2-(methylamino)propan-1-one) | 3-FMC | 1049677-77-1 |     | <chem>CC(C(=O)C1=CC(=CC=C1)F)NC</chem>   | 29.1 |
| <b>4-Methylpentedrone</b><br>(2-(Methylamino)-1-(4-methylphenyl)pentan-1-one)                     | 4-MPD | 1373918-61-6 |     | <chem>CCCC(C(=O)C1=CC=C(C=C1)C)NC</chem> | 29.1 |
| <b>Thiothinone</b><br>(2-(Methylamino)-1-(thiophen-2-yl)propan-1-one)                             | MTP   | 24065-17-6   |  | <chem>CC(C(=O)C1=CC=CS1)NC</chem>        | 57.3 |

|                                                                                                                                       |               |              |                                                                                     |                                                  |      |
|---------------------------------------------------------------------------------------------------------------------------------------|---------------|--------------|-------------------------------------------------------------------------------------|--------------------------------------------------|------|
| <b>Indanyl-<math>\alpha</math>-pyrrolidinobutiophenone</b><br>(1-(2,3-Dihydro-1 <i>H</i> -inden-5-yl)-2-(pyrrolidin-1-yl)butan-1-one) | 5-PPDI        | 2304915-05-5 | 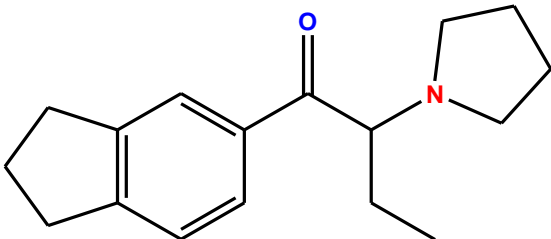  | <chem>CCC(C(=O)C1=CC2=C(CCC2)C=C1)N3CCCC3</chem> | 20.3 |
| <b><math>\alpha</math>-Butylaminohexanophenone</b><br>(2-(Butylamino)-1-(phenyl)hexan-1-one)                                          | $\alpha$ -BHP | 802576-87-0  |   | <chem>CCCCC(C(=O)C1=CC=CC=C1)NCCCC</chem>        | 29.1 |
| <b>4-Bromomethcathinone or brephedrone</b><br>(1-(4-Bromophenyl)-2-(methylamino)propan-1-one)                                         | 4-BMC         | 486459-03-4  |  | <chem>CC(C(=O)C1=CC=C(C=C1)Br)NC</chem>          | 29.1 |

|                                                                                                                |          |              |                                                                                     |                                            |      |
|----------------------------------------------------------------------------------------------------------------|----------|--------------|-------------------------------------------------------------------------------------|--------------------------------------------|------|
| <b>Hexedrone</b><br>(2-(Methylamino)-1-(phenyl)hexan-1-one)                                                    | MPH      | 2169446-41-5 | 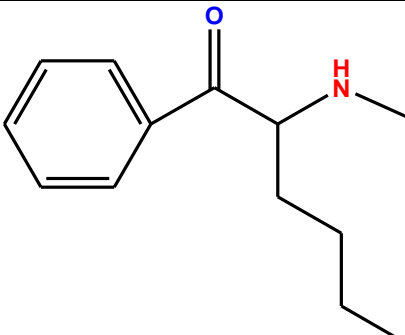 | <chem>CCCCC(C(=O)C1=CC=CC=C1)NC</chem>     | 29.1 |
| <b>2,4-Dimethylethcathinone</b><br>(1-(2,4-Dimethylphenyl)-2-(ethylamino)propan-1-one)                         | 2,4-DMEC | 1225913-88-1 |   | <chem>CCNC(C)C(=O)C1=C(C=C(C=C1)C)C</chem> | 29.1 |
| <b>2,4-Dimethylmethcathinone or 2-methylmephedrone</b><br>(1-(2,4-Dimethylphenyl)-2-(methylamino)propan-1-one) | 2,4-DMMC | 1225623-63-1 |  | <chem>CC1=CC(=C(C=C1)C(=O)C(C)N)C</chem>   | 29.1 |

|                                                                                                                                |           |              |                                                                                     |                                                    |      |
|--------------------------------------------------------------------------------------------------------------------------------|-----------|--------------|-------------------------------------------------------------------------------------|----------------------------------------------------|------|
| <b>3,4-Dimethoxy-<math>\alpha</math>-pyrrolidinopentiophenone</b><br>(1-(3,4-Dimethoxyphenyl)-2-(pyrrolidin-1-yl)pentan-1-one) | 3,4-DMPVP | 850442-84-1  | 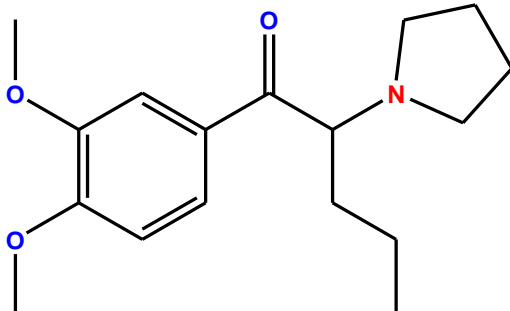  | <chem>CCCC(C(=O)C1=CC(=C(C=C1)OC)OC)N2CCCC2</chem> | 38.8 |
| <b>4-Bromo-<math>\alpha</math>-pyrrolidinopentiophenone</b><br>(1-(4-Bromophenyl)-2-(pyrrolidin-1-yl)pentan-1-one)             | 4-BrPVP   | 850352-59-9  |   | <chem>CCCC(C(=O)C1=CC=C(C=C1)Br)N2CCCC2</chem>     | 20.3 |
| <b>4-Fluoro-<math>\alpha</math>-pyrrolidinohexanophenone</b><br>(1-(4-Fluorophenyl)-2-(pyrrolidin-1-yl)hexan-1-one)            | 4-FPHP    | 2230706-09-7 |  | <chem>CCCCC(C(=O)C1=CC=C(C=C1)F)N2CCCC2</chem>     | 20.3 |

**4-Methoxy- $\alpha$ -pyrrolidinoheptanophenone**  
(1-(4-Methoxyphenyl)-2-(pyrrolidine-1-yl)heptan-1-one)

4-MeO- $\alpha$ -  
PHPP

1801552-04-4

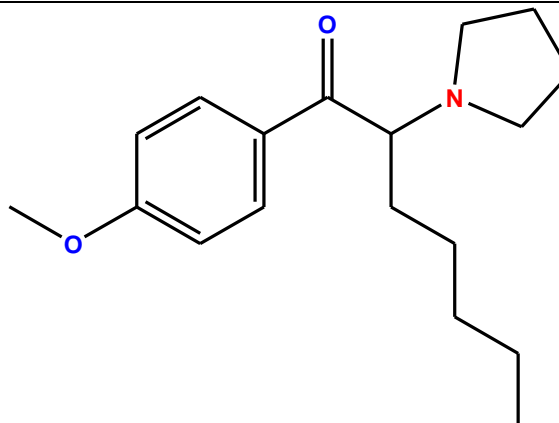

CCCCC(C(=O)C1=CC=C(C=C1)OC)N2CCCC2

29.5

**4-Methoxy- $\alpha$ -pyrrolidinooctanophenone**  
(1-(4-Methoxyphenyl)-2-(pyrrolidine-1-yl)octan-1-one)

4-MeO- $\alpha$ -  
POP

1800098-37-6

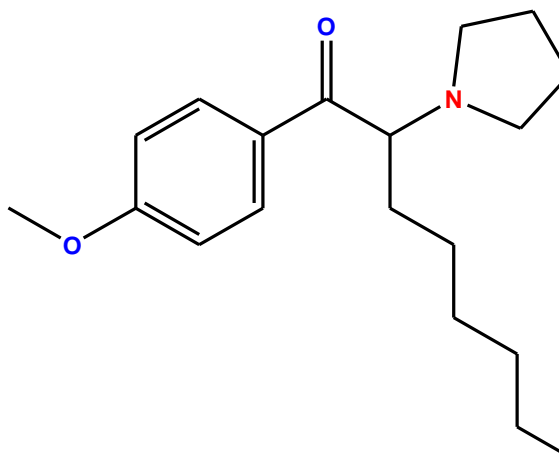

CCCCCCC(C(=O)C1=CC=C(C=C1)OC)N2CCCC2

29.5

|                                                                                                                        |                      |              |                                                                                      |                                                |      |
|------------------------------------------------------------------------------------------------------------------------|----------------------|--------------|--------------------------------------------------------------------------------------|------------------------------------------------|------|
| <b>4-Methoxy-<math>\alpha</math>-pyrrolidinovalerophenone</b><br>(1-(4-Methoxyphenyl)-2-(pyrrolidin-1-yl)pentan-1-one) | 4-MeO- $\alpha$ -PVP | 14979-97-6   | 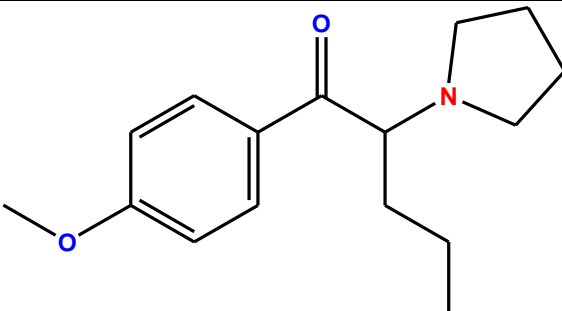   | <chem>CCCC(C(=O)C1=CC=C(C=C1)OC)N2CCCC2</chem> | 29.5 |
| <b>2-(Methylamino)-1-(naphthalen-2-yl)propan-1-one</b>                                                                 | BMAPN                | 109453-73-8  |    | <chem>CC(C(=O)C1=CC2=CC=CC=C2C=C1)NC</chem>    | 29.1 |
| <b>Dimethylpentedrone</b><br>(2-(Dimethylamino)-1-(phenyl)pentan-1-one)                                                | DMP                  | 2168229-67-0 |  | <chem>CCCC(C(=O)C1=CC=CC=C1)N(C)C</chem>       | 20.3 |

|                                                                                                                               |                |              |                                                                                      |                                                                |      |
|-------------------------------------------------------------------------------------------------------------------------------|----------------|--------------|--------------------------------------------------------------------------------------|----------------------------------------------------------------|------|
| <b><math>\alpha</math>-Propyloaminopentiophenone or <i>N</i>-propylpentedrone</b><br>(1-(Phenyl)-2-(propylamino)pentan-1-one) | $\alpha$ -PPP  | 747345-91-1  | 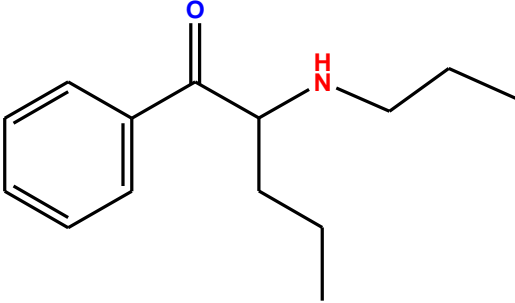   | <chem>CCCC(C(=O)C1=CC=CC=C1)NC</chem><br><chem>CC</chem>       | 29.1 |
| <b><math>\alpha</math>-Pyrrolidinohexanophenone</b><br>(1-(Phenyl)-2-(1-pyrrolidinyl)hexan-1-one)                             | $\alpha$ -PHP  | 13415-86-6   |   | <chem>CCCCC(C(=O)C1=CC=CC=C1)N</chem><br><chem>2CCCC2</chem>   | 20.3 |
| <b><math>\alpha</math>-Pyrrolidinoisohexanophenone</b><br>(4-(Methyl)-1-(phenyl)-2-(pyrrolidin-1-yl)pentan-1-one)             | $\alpha$ -PIHP | 2181620-71-1 |  | <chem>CC(C)CC(C(=O)C1=CC=CC=C1)</chem><br><chem>N2CCCC2</chem> | 20.3 |

---

**Pentedrone**  
(2-(Methylamino)-1-(phenyl)pentan-1-one)

PTD

879722-57-3

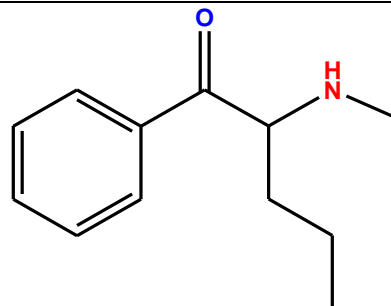

CCCC(C(=O)C1=CC=CC=C1)NC

29.1

---

**$\alpha$ -BHP:**  $\alpha$ -butylaminohexanophenone; **bk-EBDB:** eutylone; **bk-EBDP:** *N*-ethylpentylone; **bk-MAP:** methylone; **bk-MBDP:** pentylone; **bk-MDEA:** ethylone; **BMAPN:** 2-(methylamino)-1-(naphthalen-2-yl)propan-1-one; **4-BMC:** 4-bromomethcathinone or brephedrone; **BPD:** buphedrone; **4-BrPVP:** 4-bromo- $\alpha$ -pyrrolidinopentiophenone; **BTL:** butylone; **CAS:** Chemical Abstracts Service; **CATH:** cathinone or norephedrone; **2,4-DMEC:** 2,4-dimethylethcathinone; **2,4-DMMC:** 2,4-dimethylmethcathinone or 2-methylmephedrone; **3,4-DMMC:** 3,4-dimethylmethcathinone; **DMP:** dimethylpentedrone; **3,4-DMPVP:** 3,4-dimethoxy- $\alpha$ -pyrrolidinopentiophenone; **EPH:** methcathinone or ephedrone; **EPP:** ethcathinone; **3-FMC:** 3-fluoromethcathinone or 3-flephedrone; **4-FMC:** 4-fluoromethcathinone or flephedrone; **4-FPHP:** 4-fluoro- $\alpha$ -pyrrolidinohexanophenone; **IUPAC:** International Union of Pure and Applied Chemistry; **MDPBP:** 3,4-methylenedioxy- $\alpha$ -pyrrolidinobutyrophenone; **MDPV:** 3,4-methylenedioxypyrovalerone; **4-MEC:** 4-methylethcathinone; **4-MeO- $\alpha$ -PHPP:** 4-methoxy- $\alpha$ -pyrrolidinoheptanophenone; **4-MeO- $\alpha$ -POP:** 4-methoxy- $\alpha$ -pyrrolidinooctanophenone; **4-MeO- $\alpha$ -PVP:** 4-methoxy- $\alpha$ -pyrrolidinovalerophenone; **3-MMC:** 3-methylmethcathinone; **4-MMC:** mephedrone or 4-methylmethcathinone; **4-MPBP:** 4-methyl- $\alpha$ -pyrrolizinobutyrophenone; **4-MPD:** 4-methylpentedrone; **MPH:** hexedrone; **MPP:** pyrovalerone; **MTP:** thiothinone; **NPP:** naphthylpyrovalerone or naphyrone;  **$\alpha$ -PHP:**  $\alpha$ -pyrrolidinohexanophenone;  **$\alpha$ -PIHP:**  $\alpha$ -pyrrolidinoisohexanophenone; **5-PPDI:** indanyl- $\alpha$ -pyrrolidinobutyrophenone;  **$\alpha$ -PPP:**  $\alpha$ -propylaminopentiophenone or *N*-propylpentedrone; **PSA:** polar surface area; **PTD:** pentedrone;  **$\alpha$ -PVP:**  $\alpha$ -pyrrolidinovalerophenone; **SC:** synthetic cathinones; **SMILES:** Simplified Molecular Input Line Entry System; **(S)-MTFP:** (*S*)-metamfepramone or *N,N*-dimethylcathinone; **TBCP:** bupropion or amfebutamone.



**Table S2:** Brief summary of predicted data (physical-chemical properties (i.e., WSol and log Kow) and toxicity) for 44 SC using EPI Suite™ program (green algae, daphnid and fish) and TEST™ program (protozoan, *Tetrahymena pyriformis*).

| Software           |           | Parameter                                         |                                     | SC order effects                                                                                                                                                                                                                                                                                                                                                                                                                                                                                                                                                                                                                                                                                                                                                                                                                                                                                                                 |
|--------------------|-----------|---------------------------------------------------|-------------------------------------|----------------------------------------------------------------------------------------------------------------------------------------------------------------------------------------------------------------------------------------------------------------------------------------------------------------------------------------------------------------------------------------------------------------------------------------------------------------------------------------------------------------------------------------------------------------------------------------------------------------------------------------------------------------------------------------------------------------------------------------------------------------------------------------------------------------------------------------------------------------------------------------------------------------------------------|
| EPI Suite™ program | KOWWIN™   | Log Kow                                           |                                     | <ul style="list-style-type: none"> <li>• <u>Log Kow &lt; 3.00</u>: CATH (1.38) &lt; MTP (1.67) &lt; EPH (1.85) &lt; bk-MAP (1.91) &lt; 4-FMC and 3-FMC (2.05) &lt; (S)-MTFP (2.06) &lt; BPD and EPP (2.34) &lt; 3-MMC and 4-MMC (2.39) &lt; BTL and bk-MDEA (2.40) &lt; 4-BMC (2.74) &lt; PTD (2.83) &lt; bk-EBDB, bk-MBDP and 4-MEC (2.89) &lt; 3,4-DMMC and 2,4-DMMC (2.94).</li> <li>• <u>Log Kow &gt; 3.00</u>: BMAPN (3.02) &lt; DMP (3.04) &lt; MPH (3.32) &lt; bk-EBDP and 4-MPD (3.38) &lt; 2,4-DMEC (3.43) &lt; MDPBP (3.48) &lt; 3,4-DMPVP (3.56) &lt; α-PPP (3.81) &lt; TBCP (3.85) &lt; α-PVP (3.91) &lt; MDPV and 4-MPBP (3.97) &lt; 4-MeO-α-PVP (3.99) &lt; α-PIHP (4.33) &lt; α-PHP (4.40) &lt; MPP (4.46) &lt; 4-FPHP (4.60) &lt; α-BHP (4.79) &lt; 4-BrPVP (4.80) &lt; 5-PPDI (4.89) &lt; 4-MeO-α-PHPP (4.97) &lt; NPP (5.09) &lt; 4-MeO-α-POP (5.47).</li> </ul>                                               |
|                    | WSKOWWIN™ | WSol<br>(mg L <sup>-1</sup> at 25 °C)             |                                     | <ul style="list-style-type: none"> <li>• 4-MeO-α-POP (2.57) &lt; NPP (7.25) &lt; 4-MeO-α-PHPP (8.14) &lt; 4-BrPVP (8.65) &lt; 5-PPDI (14.53) &lt; α-BHP (20.05) &lt; 4-FPHP (23.81) &lt; MPP (39.83) &lt; α-PHP (44.49) &lt; α-PIHP (51.40) &lt; MDPV (70.24) &lt; 4-MeO-α-PVP (81.19) &lt; 4-MPBP (124.80) &lt; 3,4-DMPVP (128.90) &lt; α-PVP (139.40) &lt; TBCP (140.20) &lt; α-PPP (196.30) &lt; MDPBP (221.50) &lt; bk-EBDP (313.90) &lt; 2,4-DMEC (489.40) &lt; 4-MPD (546.60) &lt; MPH (610.50) &lt; bk-EBDB and bk-MBDP (984.30) &lt; BMAPN (995.50) &lt; DMP (1059.00) &lt; 4-BMC (1223.00) &lt; 3,4-DMMC and 2,4-DMMC (1515.00) &lt; 4-MEC (1692.00) &lt; PTD (1890.00) &lt; BTL and bk-MDEA (3076.00) &lt; 3-MMC and 4-MMC (5211.00) &lt; BPD and EPP (5819.00) &lt; bk-MAP (9571.00) &lt; 4-FMC and 3-FMC (9860.00) &lt; (S)-MTFP (10090.00) &lt; EPH (17810.00) &lt; MTP (23770.00) &lt; CATH (51470.00).</li> </ul> |
|                    | ECOSAR™   | Predicted acute toxicity<br>(mg L <sup>-1</sup> ) | Fish<br>(96 h/LC <sub>50</sub> )    | <ul style="list-style-type: none"> <li>• 4-MeO-α-POP (0.308) &lt; NPP (0.507) &lt; 4-MeO-α-PHPP (0.618) &lt; 5-PPDI (0.621) &lt; α-BHP (0.693) &lt; 4-BrPVP (0.861) &lt; 4-FPHP (0.987) &lt; MPP (1.144) &lt; α-PHP (1.245) &lt; α-PIHP (1.392) &lt; 4-MPBP (2.267) &lt; 4-MeO-α-PVP (2.467) &lt; α-PVP (2.468) &lt; MDPV (2.675) &lt; α-PPP (2.717) &lt; TBCP (2.786) &lt; 2,4-DMEC (4.510) &lt; 4-MPD (4.910) &lt; 3,4-DMPVP (5.318) &lt; MDPBP (5.336) &lt; MPH (5.346) &lt; bk-EBDP (5.911) &lt; DMP (8.164) &lt; BMAPN (8.707) &lt; 3,4-DMMC and 2,4-DMMC (8.832) &lt; 4-MEC (9.616) &lt; PTD (10.469) &lt; bk-EBDB and bk-MBDP (11.727) &lt; 4-BMC (15.235) &lt; 3-MMC and 4-MMC (18.731) &lt; BPD and EPP (20.393) &lt; BTL and bk-MDEA (23.181) &lt; (S)-MTFP (31.145) &lt; 4-FMC and 3-FMC (32.366) &lt; EPH (39.476) &lt; bk-MAP (45.640) &lt; MTP (53.728) &lt; CATH (73.014).</li> </ul>                             |
|                    |           |                                                   | Daphnid<br>(48 h/LC <sub>50</sub> ) | <ul style="list-style-type: none"> <li>• 4-MeO-α-POP (0.055) &lt; NPP (0.086) &lt; 5-PPDI and 4-MeO-α-PHPP (0.104) &lt; α-BHP (0.114) &lt; 4-BrPVP (0.142) &lt; 4-FPHP (0.159) &lt; MPP (0.181) &lt; α-PHP (0.196) &lt; α-PIHP (0.217) &lt; 4-MPBP (0.340) &lt; α-PVP (0.367) &lt; 4-MeO-α-PVP (0.371) &lt; α-PPP (0.400) &lt; MDPV (0.401) &lt; TBCP (0.412) &lt; 2,4-DMEC (0.635) &lt; 4-MPD (0.687) &lt; MPH (0.743) &lt; MDPBP (0.756) &lt; 3,4-DMPVP (0.760) &lt; bk-EBDP (0.828) &lt; DMP (1.098) &lt; BMAPN (1.169) &lt; 3,4-DMMC and 2,4-DMMC (1.175) &lt; 4-MEC (1.271) &lt; PTD (1.374) &lt; bk-EBDB and bk-MBDP (1.551) &lt; 4-BMC (1.979) &lt; 3-MMC and 4-MMC (2.338) &lt; BPD and EPP (2.529) &lt; BTL and bk-MDEA (2.895) &lt; (S)-MTFP (3.738) &lt; 4-FMC and 3-FMC (3.880) &lt; EPH (4.623) &lt; bk-MAP (5.384) &lt; MTP (6.162) &lt; CATH (8.100).</li> </ul>                                                  |

|  |  |                                         |                                                |                                                                                                                                                                                                                                                                                                                                                                                                                                                                                                                                                                                                                                                                                                                                                                                                                                                                                                                                                                                                                                          |
|--|--|-----------------------------------------|------------------------------------------------|------------------------------------------------------------------------------------------------------------------------------------------------------------------------------------------------------------------------------------------------------------------------------------------------------------------------------------------------------------------------------------------------------------------------------------------------------------------------------------------------------------------------------------------------------------------------------------------------------------------------------------------------------------------------------------------------------------------------------------------------------------------------------------------------------------------------------------------------------------------------------------------------------------------------------------------------------------------------------------------------------------------------------------------|
|  |  |                                         | <b>Green algae</b><br>(96 h/EC <sub>50</sub> ) | <ul style="list-style-type: none"> <li>• 4-MeO-<math>\alpha</math>-POP (0.020) &lt; NPP (0.035) &lt; 4-MeO-<math>\alpha</math>-PHPP (0.043) &lt; 5-PPDI (0.044) &lt; <math>\alpha</math>-BHP (0.050) &lt; 4-BrPVP (0.062) &lt; 4-FPHP (0.072) &lt; MPP (0.085) &lt; <math>\alpha</math>-PHP (0.093) &lt; <math>\alpha</math>-PIHP (0.105) &lt; 4-MPBP (0.178) &lt; 4-MeO-<math>\alpha</math>-PVP (0.193) &lt; <math>\alpha</math>-PVP (0.195) &lt; MDPV (0.210) &lt; <math>\alpha</math>-PPP (0.217) &lt; TBCP (0.222) &lt; 2,4-DMEC (0.377) &lt; 4-MPD (0.413) &lt; 3,4-DMPVP (0.438) &lt; MDPBP (0.443) &lt; MPH (0.452) &lt; bk-EBDP (0.497) &lt; DMP (0.713) &lt; BMAPN (0.762) &lt; 3,4-DMMC and 2,4-DMMC (0.780) &lt; 4-MEC (0.855) &lt; PTD (0.937) &lt; bk-EBDB and bk-MBDP (1.042) &lt; 4-BMC (1.378) &lt; 3-MMC and 4-MMC (1.761) &lt; BPD and EPP (1.930) &lt; BTL and bk-MDEA (2.178) &lt; (S)-MTFP (3.043) &lt; 4-FMC and 3-FMC (3.166) &lt; EPH (3.951) &lt; bk-MAP (4.535) &lt; MTP (5.488) &lt; CATH (7.705).</li> </ul> |
|  |  | <b>Predicted chronic toxicity (ChV)</b> | <b>Fish</b><br>(mg L <sup>-1</sup> )           | <ul style="list-style-type: none"> <li>• 4-MeO-<math>\alpha</math>-POP (0.005) &lt; NPP (0.010) &lt; 5-PPDI and 4-MeO-<math>\alpha</math>-PHPP (0.013) &lt; <math>\alpha</math>-BHP (0.015) &lt; 4-BrPVP (0.019) &lt; 4-FPHP (0.023) &lt; MPP (0.028) &lt; <math>\alpha</math>-PHP (0.031) &lt; <math>\alpha</math>-PIHP (0.036) &lt; 4-MPBP (0.066) &lt; 4-MeO-<math>\alpha</math>-PVP (0.071) &lt; <math>\alpha</math>-PVP (0.073) &lt; MDPV (0.077) &lt; <math>\alpha</math>-PPP (0.083) &lt; TBCP (0.084) &lt; 2,4-DMEC (0.158) &lt; 4-MPD (0.175) &lt; 3,4-DMPVP (0.178) &lt; MDPBP (0.184) &lt; MPH (0.195) &lt; bk-EBDP (0.211) &lt; DMP (0.329) &lt; BMAPN (0.353) &lt; 3,4-DMMC and 2,4-DMMC (0.368) &lt; 4-MEC (0.409) &lt; PTD (0.454) &lt; bk-EBDB and bk-MBDP (0.498) &lt; 4-BMC (0.683) &lt; 3-MMC and 4-MMC (0.948) &lt; BPD and EPP (1.053) &lt; BTL and bk-MDEA (1.171) &lt; (S)-MTFP (1.776) &lt; 4-FMC and 3-FMC (1.853) &lt; EPH (2.426) &lt; bk-MAP (2.744) &lt; MTP (3.519) &lt; CATH (5.292).</li> </ul>          |
|  |  |                                         | <b>Daphnid</b><br>(mg L <sup>-1</sup> )        | <ul style="list-style-type: none"> <li>• 4-MeO-<math>\alpha</math>-POP (0.007) &lt; NPP (0.010) &lt; 5-PPDI and 4-MeO-<math>\alpha</math>-PHPP (0.012) &lt; <math>\alpha</math>-BHP (0.013) &lt; 4-BrPVP (0.016) &lt; 4-FPHP (0.018) &lt; MPP (0.020) &lt; <math>\alpha</math>-PHP (0.021) &lt; <math>\alpha</math>-PIHP (0.023) &lt; 4-MPBP (0.035) &lt; <math>\alpha</math>-PVP (0.037) &lt; 4-MeO-<math>\alpha</math>-PVP (0.038) &lt; <math>\alpha</math>-PPP (0.040) &lt; MDPV (0.041) &lt; TBCP (0.042) &lt; 2,4-DMEC (0.061) &lt; 4-MPD (0.066) &lt; MPH (0.071) &lt; MDPBP (0.073) &lt; 3,4-DMPVP (0.074) &lt; bk-EBDP (0.079) &lt; DMP (0.102) &lt; 3,4-DMMC and 2,4-DMMC (0.107) &lt; BMAPN (0.108) &lt; 4-MEC (0.115) &lt; PTD (0.124) &lt; bk-EBDB and bk-MBDP (0.141) &lt; 4-BMC (0.177) &lt; 3-MMC and 4-MMC (0.201) &lt; BPD and EPP (0.216) &lt; BTL and bk-MDEA (0.249) &lt; (S)-MTFP (0.309) &lt; 4-FMC and 3-FMC (0.320) &lt; EPH (0.373) &lt; bk-MAP (0.438) &lt; MTP (0.488) &lt; CATH (0.620).</li> </ul>          |
|  |  |                                         | <b>Green algae</b><br>(mg L <sup>-1</sup> )    | <ul style="list-style-type: none"> <li>• 4-MeO-<math>\alpha</math>-POP (0.009) &lt; NPP (0.015) &lt; 4-MeO-<math>\alpha</math>-PHPP (0.018) &lt; 5-PPDI (0.019) &lt; <math>\alpha</math>-BHP (0.021) &lt; 4-BrPVP (0.026) &lt; 4-FPHP (0.030) &lt; MPP (0.035) &lt; <math>\alpha</math>-PHP (0.038) &lt; <math>\alpha</math>-PIHP (0.042) &lt; 4-MPBP (0.070) &lt; <math>\alpha</math>-PVP and 4-MeO-<math>\alpha</math>-PVP (0.076) &lt; MDPV (0.082) &lt; <math>\alpha</math>-PPP (0.084) &lt; TBCP (0.086) &lt; 2,4-DMEC (0.141) &lt; 4-MPD (0.154) &lt; 3,4-DMPVP (0.166) &lt; MDPBP (0.167) &lt; MPH (0.168) &lt; bk-EBDP (0.185) &lt; DMP (0.258) &lt; BMAPN (0.276) &lt; 3,4-DMMC and 2,4-DMMC (0.280) &lt; 4-MEC (0.306) &lt; PTD (0.333) &lt; bk-EBDB and bk-MBDP (0.373) &lt; 4-BMC (0.487) &lt; 3-MMC and 4-MMC (0.604) &lt; BPD and EPP (0.659) &lt; BTL and bk-MDEA (0.748) &lt; (S)-MTFP (1.015) &lt; 4-FMC and 3-FMC (1.055) &lt; EPH (1.295) &lt; bk-MAP (1.494) &lt; MTP (1.772) &lt; CATH (2.429).</li> </ul>          |

|  |         |                                                                                |         |                                                                                                                                                                                                                                                                                                                                                                                                                                                                                                                                                                                                                                                                                                                                                                                                                                                                                                                                                                                                                      |
|--|---------|--------------------------------------------------------------------------------|---------|----------------------------------------------------------------------------------------------------------------------------------------------------------------------------------------------------------------------------------------------------------------------------------------------------------------------------------------------------------------------------------------------------------------------------------------------------------------------------------------------------------------------------------------------------------------------------------------------------------------------------------------------------------------------------------------------------------------------------------------------------------------------------------------------------------------------------------------------------------------------------------------------------------------------------------------------------------------------------------------------------------------------|
|  | BCFBAF™ | Estimated<br>BCF <sup>1</sup><br>(L Kg <sup>-1</sup> wet<br>wt <sup>-1</sup> ) | Fish UT | <ul style="list-style-type: none"> <li>• &lt; 2000.000 L Kg<sup>-1</sup> wet wt<sup>-1</sup> (Not bioaccumulative): CATH (2.947) &lt; MTP (5.364) &lt; (S)-MTFP (5.591) &lt; EPH (7.413) &lt; bk-MAP (9.078) &lt; 4-FMC and 3-FMC (12.320) &lt; BPD and EPP (20.170) &lt; DMP (21.390) &lt; 3-MMC and 4-MMC (25.300) &lt; BTL and bk-MDEA (25.650) &lt; α-PVP (32.920) &lt; 5-PPDI (42.730) &lt; 3,4-DMPVP (42.960) &lt; α-PIHP (44.290) &lt; α-PHP (49.750) &lt; PTD (53.500) &lt; MDPBP (54.280) &lt; 4-BMC (54.330) &lt; 4-MEC (71.780) &lt; bk-EBDB and bk-MBDP (72.840) &lt; 3,4-DMMC and 2,4-DMMC (74.450) &lt; 4-MPBP (81.370) &lt; MDPV (83.320) &lt; 4-MeO-α-PVP (88.810) &lt; BMAPN (104.300) &lt; MPP (117.200) &lt; MPH (131.600) &lt; 2,4-DMEC (185.100) &lt; 4-MPD (191.700) &lt; 4-MeO-α-PHPP (191.800) &lt; bk-EBDP (194.700) &lt; 4-FPHP (201.000) &lt; 4-BrPVP (205.000) &lt; 4-MeO-α-POP (255.800) &lt; α-PPP (259.000) &lt; NPP (373.800) &lt; TBCP (573.300) &lt; α-BHP (793.200).</li> </ul>   |
|  |         |                                                                                | Fish MT | <ul style="list-style-type: none"> <li>• &lt; 2000.000 L Kg<sup>-1</sup> wet wt<sup>-1</sup> (Not bioaccumulative): CATH (2.407) &lt; MTP (3.959) &lt; (S)-MTFP (5.416) &lt; EPH (5.429) &lt; bk-MAP (6.339) &lt; 4-FMC and 3-FMC (8.423) &lt; BPD and EPP (14.540) &lt; 3-MMC and 4-MMC (17.270) &lt; BTL and bk-MDEA (17.490) &lt; DMP (24.400) &lt; 4-BMC (36.800) &lt; PTD (40.350) &lt; α-PVP (43.170) &lt; 4-MEC (49.950) &lt; bk-EBDB and bk-MBDP (50.650) &lt; 3,4-DMPVP (52.300) &lt; 3,4-DMMC and 2,4-DMMC (54.140) &lt; 5-PPDI (58.090) &lt; α-PIHP (59.290) &lt; MDPBP (62.650) &lt; α-PHP (66.710) &lt; BMAPN (70.280) &lt; 4-MPBP (102.100) &lt; MDPV (104.500) &lt; MPH (108.600) &lt; 4-MeO-α-PVP (111.200) &lt; 4-MPD (142.100) &lt; 2,4-DMEC (147.500) &lt; MPP (154.200) &lt; bk-EBDP (144.200) &lt; α-PPP (249.700) &lt; 4-MeO-α-PHPP (257.900) &lt; 4-FPHP (262.000) &lt; 4-BrPVP (272.200) &lt; 4-MeO-α-POP (348.200) &lt; TBCP (424.800) &lt; NPP (497.600) &lt; α-BHP (961.100).</li> </ul>  |
|  |         |                                                                                | Fish LT | <ul style="list-style-type: none"> <li>• &lt; 2000.000 L Kg<sup>-1</sup> wet wt<sup>-1</sup> (Not bioaccumulative): CATH (2.257) &lt; MTP (3.612) &lt; (S)-MTFP (5.239) &lt; EPH (4.923) &lt; bk-MAP (5.689) &lt; 4-FMC and 3-FMC (7.509) &lt; BPD and EPP (13.040) &lt; 3-MMC and 4-MMC (15.320) &lt; BTL and bk-MDEA (15.520) &lt; DMP (24.860) &lt; 4-BMC (32.530) &lt; PTD (36.450) &lt; 4-MEC (44.370) &lt; bk-EBDB and bk-MBDP (44.970) &lt; α-PVP (46.600) &lt; 3,4-DMMC and 2,4-DMMC (48.510) &lt; 3,4-DMPVP (54.630) &lt; BMAPN (62.010) &lt; 5-PPDI (63.790) &lt; MDPBP (64.060) &lt; α-PIHP (64.610) &lt; α-PHP (72.740) &lt; MPH (100.100) &lt; 4-MPBP (108.000) &lt; MDPV (110.500) &lt; 4-MeO-α-PVP (117.500) &lt; 4-MPD (127.800) &lt; bk-EBDP (129.600) &lt; 2,4-DMEC (134.800) &lt; MPP (166.500) &lt; α-PPP (240.100) &lt; 4-MeO-α-PHPP (281.300) &lt; 4-FPHP (281.800) &lt; 4-BrPVP (295.200) &lt; TBCP (381.700) &lt; 4-MeO-α-POP (382.100) &lt; NPP (540.200) &lt; α-BHP (1001.000).</li> </ul> |
|  |         | Estimated<br>BAF <sup>1</sup><br>(L Kg <sup>-1</sup> wet<br>wt <sup>-1</sup> ) | Fish UT | <ul style="list-style-type: none"> <li>• &lt; 2000.000 L Kg<sup>-1</sup> wet wt<sup>-1</sup> (Not bioaccumulative): CATH (2.947) &lt; MTP (5.364) &lt; (S)-MTFP (5.591) &lt; EPH (7.413) &lt; bk-MAP (9.078) &lt; 4-FMC and 3-FMC (12.320) &lt; BPD and EPP (20.170) &lt; DMP (21.390) &lt; 3-MMC and 4-MMC (25.300) &lt; BTL and bk-MDEA (25.660) &lt; α-PVP (32.920) &lt; 5-PPDI (42.730) &lt; 3,4-DMPVP (42.960) &lt; α-PIHP (44.290) &lt; α-PHP (49.750) &lt; PTD (53.500) &lt; MDPBP (54.280) &lt; 4-BMC (54.330) &lt; 4-MEC (71.790) &lt; bk-EBDB and bk-MBDP (72.850) &lt; 3,4-DMMC and 2,4-DMMC (74.460) &lt; 4-MPBP (81.370) &lt; MDPV (83.320) &lt; 4-MeO-α-PVP (88.820) &lt; BMAPN (104.300) &lt; MPP (117.200) &lt; MPH (131.600) &lt; 2,4-DMEC (185.200) &lt; 4-MPD (191.700) &lt; 4-MeO-α-PHPP (192.000) &lt; bk-EBDP (194.800) &lt; 4-FPHP (201.100) &lt; 4-BrPVP (205.200) &lt; 4-MeO-α-POP (257.400) &lt; α-PPP (259.100) &lt; NPP (375.900) &lt; TBCP (579.600) &lt; α-BHP (805.400).</li> </ul>   |

|  |  |                                                                          |                |                                                                                                                                                                                                                                                                                                                                                                                                                                                                                                                                                                                                                                                                                                                                                                                                                                                                                                                                                                                                                                                                                                                                                                                                                                                                                                                                                                                                       |
|--|--|--------------------------------------------------------------------------|----------------|-------------------------------------------------------------------------------------------------------------------------------------------------------------------------------------------------------------------------------------------------------------------------------------------------------------------------------------------------------------------------------------------------------------------------------------------------------------------------------------------------------------------------------------------------------------------------------------------------------------------------------------------------------------------------------------------------------------------------------------------------------------------------------------------------------------------------------------------------------------------------------------------------------------------------------------------------------------------------------------------------------------------------------------------------------------------------------------------------------------------------------------------------------------------------------------------------------------------------------------------------------------------------------------------------------------------------------------------------------------------------------------------------------|
|  |  |                                                                          | <b>Fish MT</b> | <ul style="list-style-type: none"> <li>• <u>&lt; 2000.000 L Kg<sup>-1</sup> wet wt<sup>-1</sup> (Not bioaccumulative)</u>: CATH (2.407) &lt; MTP (3.960) &lt; (S)-MTFP (5.416) &lt; EPH (5.429) &lt; bk-MAP (6.340) &lt; 4-FMC and 3-FMC (8.424) &lt; BPD and EPP (14.540) &lt; 3-MMC and 4-MMC (17.270) &lt; BTL and bk-MDEA (17.500) &lt; DMP (24.400) &lt; 4-BMC (36.830) &lt; <math>\alpha</math>-PVP (43.190) &lt; PTD (49.360) &lt; 4-MEC (49.990) &lt; bk-EBDB and bk-MBDP (50.690) &lt; 3,4-DMPVP (52.320) &lt; 3,4-DMMC and 2,4-DMMC (54.170) &lt; 5-PPDI (58.400) &lt; <math>\alpha</math>-PIHP (59.380) &lt; MDPBP (62.670) &lt; <math>\alpha</math>-PHP (66.840) &lt; BMAPN (70.450) &lt; 4-MPBP (102.300) &lt; MDPV (104.600) &lt; MPH (108.700) &lt; 4-MeO-<math>\alpha</math>-PVP (111.400) &lt; 4-MPD (142.500) &lt; 2,4-DMEC (147.900) &lt; MPP (155.000) &lt; bk-EBDP (144.600) &lt; <math>\alpha</math>-PPP (250.800) &lt; 4-FPHP and 4-MeO-<math>\alpha</math>-PHPP (265.500) &lt; 4-BrPVP (278.000) &lt; 4-MeO-<math>\alpha</math>-POP (391.900) &lt; TBCP (435.800) &lt; NPP (535.500) &lt; <math>\alpha</math>-BHP (1047.000).</li> </ul>                                                                                                                                                                                                                                      |
|  |  |                                                                          | <b>Fish LT</b> | <ul style="list-style-type: none"> <li>• <u>&lt; 2000.000 L Kg<sup>-1</sup> wet wt<sup>-1</sup> (Not bioaccumulative)</u>: CATH (2.257) &lt; MTP (3.612) &lt; (S)-MTFP (5.239) &lt; EPH (4.924) &lt; bk-MAP (5.691) &lt; 4-FMC and 3-FMC (7.514) &lt; BPD and EPP (13.050) &lt; 3-MMC and 4-MMC (15.340) &lt; BTL and bk-MDEA (15.530) &lt; DMP (24.880) &lt; 4-BMC (32.610) &lt; PTD (36.510) &lt; 4-MEC (44.490) &lt; bk-EBDB and bk-MBDP (45.100) &lt; <math>\alpha</math>-PVP (46.910) &lt; 3,4-DMMC and 2,4-DMMC (48.630) &lt; 3,4-DMPVP (54.830) &lt; BMAPN (62.370) &lt; MDPBP (64.290) &lt; <math>\alpha</math>-PIHP (65.910) &lt; 5-PPDI (68.350) &lt; <math>\alpha</math>-PHP (74.570) &lt; MPH (100.600) &lt; 4-MPBP (109.400) &lt; MDPV (111.900) &lt; 4-MeO-<math>\alpha</math>-PVP (119.100) &lt; 4-MPD (129.000) &lt; bk-EBDP (130.900) &lt; 2,4-DMEC (136.000) &lt; MPP (174.000) &lt; <math>\alpha</math>-PPP (244.600) &lt; 4-FPHP (305.000) &lt; 4-BrPVP (333.600) &lt; 4-MeO-<math>\alpha</math>-PHPP (333.900) &lt; TBCP (399.700) &lt; 4-MeO-<math>\alpha</math>-POP (640.200) &lt; NPP (724.200) &lt; <math>\alpha</math>-BHP (1263.000).</li> </ul>                                                                                                                                                                                                                           |
|  |  | <b>Estimated BCF<sup>2</sup> (L Kg<sup>-1</sup> wet wt<sup>-1</sup>)</b> | <b>Fish UT</b> | <ul style="list-style-type: none"> <li>• <u>&lt; 2000.000 L Kg<sup>-1</sup> wet wt<sup>-1</sup> (Not bioaccumulative)</u>: CATH (3.469) &lt; MTP (5.871) &lt; EPH (8.424) &lt; bk-MAP (9.577) &lt; 4-FMC and 3-FMC (12.840) &lt; (S)-MTFP (13.140) &lt; BPD and EPP (24.210) &lt; 3-MMC and 4-MMC (27.430) &lt; BTL and bk-MDEA (27.780) &lt; 4-BMC (59.250) &lt; PTD (73.020) &lt; 4-MEC (82.960) &lt; bk-EBDB and bk-MBDP (84.040) &lt; 3,4-DMMC and 2,4-DMMC (94.260) &lt; BMAPN (113.400) &lt; DMP (118.000) &lt; MPH (223.300) &lt; 4-MPD (253.700) &lt; bk-EBDP (257.000) &lt; 2,4-DMEC (288.300) &lt; MDPBP (321.800) &lt; 3,4-DMPVP (380.000) &lt; <math>\alpha</math>-PPP (679.400) &lt; TBCP (747.100) &lt; <math>\alpha</math>-PVP (847.900) &lt; 4-MPBP (961.200) &lt; MDPV (973.500) &lt; 4-MeO-<math>\alpha</math>-PVP (1016.000).</li> <li>• <u>2000.000 ≤ 5000.000 L Kg<sup>-1</sup> wet wt<sup>-1</sup> (Bioaccumulative)</u>: <math>\alpha</math>-PIHP (2121.000) &lt; <math>\alpha</math>-PHP (2480.000) &lt; MPP (2790.000) &lt; 4-FPHP (3752.000).</li> <li>• <u>&gt; 5000.000 L Kg<sup>-1</sup> wet wt<sup>-1</sup> (Very bioaccumulative)</u>: <math>\alpha</math>-BHP (5456.000) &lt; 4-BrPVP (5524.000) &lt; 5-PPDI (6543.000) &lt; 4-MeO-<math>\alpha</math>-PHPP (7541.000) &lt; NPP (9086.000) &lt; 4-MeO-<math>\alpha</math>-POP (15020.000).</li> </ul>                 |
|  |  | <b>Estimated BAF<sup>2</sup> (L Kg<sup>-1</sup> wet wt<sup>-1</sup>)</b> |                | <ul style="list-style-type: none"> <li>• <u>&lt; 2000.000 L Kg<sup>-1</sup> wet wt<sup>-1</sup> (Not bioaccumulative)</u>: CATH (3.510) &lt; MTP (5.964) &lt; EPH (8.587) &lt; bk-MAP (9.777) &lt; 4-FMC and 3-FMC (13.160) &lt; (S)-MTFP (13.470) &lt; BPD and EPP (25.150) &lt; 3-MMC and 4-MMC (28.610) &lt; BTL and bk-MDEA (28.980) &lt; 4-BMC (64.050) &lt; PTD (80.130) &lt; 4-MEC (92.020) &lt; bk-EBDB and bk-MBDP (93.330) &lt; 3,4-DMMC and 2,4-DMMC (105.800) &lt; BMAPN (130.000) &lt; DMP (135.900) &lt; MPH (285.200) &lt; 4-MPD (333.500) &lt; bk-EBDP (338.900) &lt; 2,4-DMEC (391.000) &lt; MDPBP (449.500) &lt; 3,4-DMPVP (559.200) &lt; <math>\alpha</math>-PPP (1247.000) &lt; TBCP (1435.000) &lt; <math>\alpha</math>-PVP (1735.000).</li> <li>• <u>2000.000 ≤ 5000.000 L Kg<sup>-1</sup> wet wt<sup>-1</sup> (Bioaccumulative)</u>: 4-MPBP (2104.000) &lt; MDPV (2146.000) &lt; 4-MeO-<math>\alpha</math>-PVP (2293.000).</li> <li>• <u>&gt; 5000.000 L Kg<sup>-1</sup> wet wt<sup>-1</sup> (Very bioaccumulative)</u>: <math>\alpha</math>-PIHP (7884.000) &lt; <math>\alpha</math>-PHP (10450.000) &lt; MPP (13000.000) &lt; 4-FPHP (22860.000) &lt; <math>\alpha</math>-BHP (48620.000) &lt; 4-BrPVP (49900.000) &lt; 5-PPDI (71490.000) &lt; 4-MeO-<math>\alpha</math>-PHPP (97660.000) &lt; NPP (149800.000) &lt; 4-MeO-<math>\alpha</math>-POP (568100.000).</li> </ul> |

|               |                                                                 |                                                          |                                                                                                                                                                                                                                                                                                                                                                                                                                                                                                                                                                                                                                                                                                                                                                                                                                                                                                                                                                                                                                                                            |
|---------------|-----------------------------------------------------------------|----------------------------------------------------------|----------------------------------------------------------------------------------------------------------------------------------------------------------------------------------------------------------------------------------------------------------------------------------------------------------------------------------------------------------------------------------------------------------------------------------------------------------------------------------------------------------------------------------------------------------------------------------------------------------------------------------------------------------------------------------------------------------------------------------------------------------------------------------------------------------------------------------------------------------------------------------------------------------------------------------------------------------------------------------------------------------------------------------------------------------------------------|
| TEST™ program | Predicted<br>48 h<br>IGC <sub>50</sub><br>(mg L <sup>-1</sup> ) | Protozoan<br>( <i>Tetrahymena</i><br><i>pyriformis</i> ) | <ul style="list-style-type: none"> <li>• NPP (1.11) &lt; 4-MeO-<math>\alpha</math>-POP (1.27) &lt; 4-FPHP (1.67) &lt; 4-MeO-<math>\alpha</math>-PHPP (2.01) &lt; 4-BrPVP (2.23) &lt; <math>\alpha</math>-BHP (2.36) &lt; <math>\alpha</math>-PHP (4.25) &lt; MPP (4.33) &lt; TBCP (4.61) &lt; 4-MeO-<math>\alpha</math>-PVP (4.85) &lt; <math>\alpha</math>-PIHP (5.29) &lt; 5-PPDI (5.30) &lt; <math>\alpha</math>-PPP (5.61) &lt; BMAPN (5.85) &lt; 3,4-DMPVP (6.16) &lt; MDPV (6.50) &lt; <math>\alpha</math>-PVP (6.54) &lt; 4-MPBP (6.55) &lt; MPH (7.42) &lt; 4-MPD (7.69) &lt; 2,4-DMEC (9.64) &lt; MDPBP (13.42) &lt; 4-BMC (13.81) &lt; 4-MEC (16.91) &lt; 2,4-DMMC (17.09) &lt; bk-EBDP (17.68) &lt; 3,4-DMMC (17.83) &lt; PTD (19.28) &lt; bk-MBDP (25.78) &lt; DMP (26.52) &lt; bk-EBDB (27.48) &lt; EPP (28.95) &lt; MTP (31.57) &lt; 4-MMC (34.76) &lt; 3-MMC (39.03) &lt; BPD (47.47) &lt; bk-MDEA (51.56) &lt; BTL (51.80) &lt; 4-FMC (54.94) &lt; 3-FMC (59.07) &lt; bk-MAP (74.66) &lt; (S)-MTFP (94.97) &lt; EPH (97.31) &lt; CATH (148.21).</li> </ul> |
|---------------|-----------------------------------------------------------------|----------------------------------------------------------|----------------------------------------------------------------------------------------------------------------------------------------------------------------------------------------------------------------------------------------------------------------------------------------------------------------------------------------------------------------------------------------------------------------------------------------------------------------------------------------------------------------------------------------------------------------------------------------------------------------------------------------------------------------------------------------------------------------------------------------------------------------------------------------------------------------------------------------------------------------------------------------------------------------------------------------------------------------------------------------------------------------------------------------------------------------------------|

BAF: bioaccumulation factor; BCF: bioconcentration factor;  $\alpha$ -BHP:  $\alpha$ -butylaminoheptanophenone; bk-EBDB: eutylone; bk-EBDP: *N*-ethylpentylone; bk-MAP: methylone; bk-MBDP: pentylone; bk-MDEA: ethylone; BMAPN: 2-(methylamino)-1-(naphthalen-2-yl)propan-1-one; 4-BMC: 4-bromomethcathinone or brephedrone; BPD: buphedrone; 4-BrPVP: 4-bromo- $\alpha$ -pyrrolidinopentiophenone; BTL: butylone; CATH: cathinone or norephedrone; ChV: chronic effects values; 2,4-DMEC: 2,4-dimethylethcathinone; 2,4-DMMC: 2,4-dimethylmethcathinone or 2-methylmephedrone; 3,4-DMMC: 3,4-dimethylmethcathinone; DMP: dimethylpentedrone; 3,4-DMPVP: 3,4-dimethoxy- $\alpha$ -pyrrolidinopentiophenone; EC<sub>50</sub>: half maximal effective concentration; EPH: methcathinone or ephedrone; EPP: ethcathinone; 3-FMC: 3-fluoromethcathinone or 3-flephedrone; 4-FMC: 4-fluoromethcathinone or flephedrone; 4-FPHP: 4-fluoro- $\alpha$ -pyrrolidinoheptanophenone; h: hours; IGC<sub>50</sub>: 50 % of the inhibition growth concentration; LC<sub>50</sub>: half maximal lethal concentration; Log Kow: values calculated using the log octanol-water partition coefficient calculation program KOWWIN™; LT: lower trophic; MDPBP: 3,4-methylenedioxy- $\alpha$ -pyrrolidinobutyrophenone; MDPV: 3,4-methylenedioxypyrovalerone; 4-MEC: 4-methylethcathinone; 4-MeO- $\alpha$ -PHPP: 4-methoxy- $\alpha$ -pyrrolidinoheptanophenone; 4-MeO- $\alpha$ -POP: 4-methoxy- $\alpha$ -pyrrolidinooctanophenone; 4-MeO- $\alpha$ -PVP: 4-methoxy- $\alpha$ -pyrrolidinovalerophenone; 3-MMC: 3-methylmethcathinone; 4-MMC: mephedrone or 4-methylmethcathinone; 4-MPBP: 4-methyl- $\alpha$ -pyrrolizinobutyrophenone; 4-MPD: 4-methylpentedrone; MPH: hexedrone; MPP: pyrovalerone; MT: mid trophic; MTP: thiothinone; NPP: naphthylpyrovalerone or naphyrone;  $\alpha$ -PHP:  $\alpha$ -pyrrolidinoheptanophenone;  $\alpha$ -PIHP:  $\alpha$ -pyrrolidinoisohexanophenone; 5-PPDI: indanyl- $\alpha$ -pyrrolidinobutyrophenone;  $\alpha$ -PPP:  $\alpha$ -propylaminopentiophenone or *N*-propylpentedrone; PTD: pentedrone;  $\alpha$ -PVP:  $\alpha$ -pyrrolidinovalerophenone; SC: synthetic cathinones; (S)-MTFP: (S)-metamfetramone or *N,N*-dimethylcathinone; TBCP: bupropion or amfebutamone; UT: upper trophic; WSol: water solubility; <sup>1</sup>Arnot-Gobas method n° 1: considering biotransformation rate estimates; <sup>2</sup>Arnot-Gobas method n° 2: assuming a biotransformation rate of zero.

## 1.2. In vivo assays

### 1.2.1. Sub-chronic assays in *Tetrahymena thermophila*

Sub-chronic ecotoxicity assays were performed on *T. thermophila* for 28 hours (h), and a reference test with K<sub>2</sub>Cr<sub>2</sub>O<sub>7</sub> at five concentrations ranging between 5.60 and 56.00 mg L<sup>-1</sup> was conducted. The respective results are described in **Table S3**.

**Table S3:** Percentage of growth inhibition vs log concentration of *Tetrahymena thermophila* after 28 h of exposure to K<sub>2</sub>Cr<sub>2</sub>O<sub>7</sub> at five concentrations tested.

| Reference test/Log concentration              | Growth inhibition average (%) |       |       |       |       |
|-----------------------------------------------|-------------------------------|-------|-------|-------|-------|
|                                               | 0.748                         | 1.000 | 1.255 | 1.505 | 1.748 |
| K <sub>2</sub> Cr <sub>2</sub> O <sub>7</sub> | -3                            | 5     | 50    | 86    | 85    |

## 2. MATERIALS AND METHODS

### 2.1. In vivo assays

#### 2.1.1. Sub-chronic assays with *T. thermophila*

A ciliate inoculum was prepared from a stock culture by adjusting optical density (OD) at wavelength ( $\lambda$ ) of 440 nm to 0.040 with standard freshwater (SFW) medium. To perform the assays, disposable 1 cm spectrophotometric cells were used to measure the OD. Each test cell contained 40  $\mu$ L of *T. thermophila* ciliate inoculum and food suspension. Control and five tested synthetic cathinones (SC) were incubated in an Infors HT Ecotron incubator (Fisher Scientific, Portugal) at 30 °C in darkness, for 24 and 28 h. Assays were performed in triplicate and OD measurements at 0, 24 and 28 h were performed using an UV/Vis spectrophotometer (ATI Unicam, Leeds, England) at 440 nm. The OD in the controls after 24 or 28 h of incubation must show a decrease of the T0 value by at least 60 % as the uninhibited growth of the ciliates will consume the food substrate. The percentage of growth inhibition can be calculated from the difference in OD between the control cells and the test cells after 24 or 28 h using the following equation:

$$\% \text{ Growth Inhibition}_{(C1-C5)} = \left( 1 - \frac{\Delta OD_{(C1-C5)}}{\Delta OD_{(C0)}} \right) \times 100 \quad (1)$$

where  $\Delta OD_{(C1-C5)}$  is the difference between the absorbance after the incubation (T24h or T28h) and prior to the test (T0h) and  $\Delta OD_{(C0)}$  is the absorbance in the control tests.

#### 2.1.2. Sublethal assay with *Daphnia magna*

##### 2.1.2.1. Culture maintenance of microalgae *Raphidocelis subcapitata*

The microalgae *R. subcapitata* culture medium is prepared using the following macronutrients stock solutions: 2.55 g of NaNO<sub>3</sub>; 1.22 g of MgCl<sub>2</sub>·6H<sub>2</sub>O; 0.44 g of CaCl<sub>2</sub>·2H<sub>2</sub>O; 1.47 g of MgSO<sub>4</sub>·7H<sub>2</sub>O; 0.10 g of K<sub>2</sub>HPO<sub>4</sub>; and 1.50 g of NaHCO<sub>3</sub> prepared in 100 mL of distilled water and stored in an amber glass bottles at 4 °C. A micronutrients stock solution is prepared containing the following substances: 46.38 mg of H<sub>3</sub>BO<sub>3</sub>, 103.85 mg of MnCl<sub>2</sub>·4H<sub>2</sub>O, 0.82 mg of ZnCl<sub>2</sub>, 39.94 mg of FeCl<sub>3</sub>·6H<sub>2</sub>O, 0.36 mg of CoCl<sub>2</sub>·6H<sub>2</sub>O, 1.82 mg of Na<sub>2</sub>MoO<sub>4</sub>·2H<sub>2</sub>O and 75.00 mg of Na<sub>2</sub>EDTA·2H<sub>2</sub>O prepared in 250 mL of distilled water and stored in an amber glass bottle at 4 °C. About 1 mL of each macronutrient stock solution and 1 mL of micronutrients stock solution is added each 1 L of distilled water and pH adjusted to 7.5  $\pm$  0.1.

The culture is maintained for 7 days in the biotrium at a constant temperature (20  $\pm$  2 °C) with illumination at 6000 lux and a photoperiod of 16:8 h light: dark.

##### 2.1.2.2. Biochemical determinations

The *Bradford* assay is a colorimetric technique used for protein quantification. A calibration curve with bovine serum albumin (BSA) was performed at a concentration range of 0.0015 to 0.0250 mg mL<sup>-1</sup>. Each sample (2  $\mu$ L diluted in 98  $\mu$ L of phosphate buffer solution (PBS)) were

incubate for 5 min at room temperature (RT) with 100  $\mu\text{L}$  of Bradford reagent. The absorbance was read at  $\lambda$  of 595 nm in a microplate reader and results express as  $\text{mg mL}^{-1}$  of BSA [1, 2].

Catalase (CAT) activity was determined with a spectrophotometric method at  $\lambda$  of 415 nm and 25 °C. Briefly, the standards of CAT and samples (50  $\mu\text{L}$ ) were incubated with 100  $\mu\text{L}$  of 60  $\mu\text{M}$   $\text{H}_2\text{O}_2$ /60 mM sodium phosphate buffer (SPB) at 37 °C for 1 min. The enzymatic reaction was stopped by the addition of 250  $\mu\text{L}$  of 32 mM ammonium molybdate tetrahydrate (AMT), incubate at RT for 5 min. Blanks were prepared with PBS, 60  $\mu\text{M}$   $\text{H}_2\text{O}_2$ /60 mM SPB and 32 mM AMT. CAT activity is determined by a calibration curve of CAT (concentration range of 0.156 to 7.000  $\text{U mL}^{-1}$ ), and results express as U of CAT per mg of protein [3-5].

For Reactive oxygen species (ROS) assay, the 2',7'-dichlorofluorescein diacetate ( $\text{H}_2\text{DCFDA}$ ), a fluorescent probe was used. For that, 10  $\mu\text{L}$  of each sample, 110  $\mu\text{L}$  of PBS and 8.3  $\mu\text{L}$  of 21 mM  $\text{H}_2\text{DCFDA}$  are incubate at 37 °C for 30 min. Fluorescence was read at 25 °C with an excitation  $\lambda$  of 485 nm and an emission  $\lambda$  of 528 nm in a microplate reader. Results was express as  $\mu\text{mol}$  of DCF per mg of protein, through a DCF calibration curve (concentration range of 0.078125 to 20.00  $\mu\text{M}$ ) [6, 7].

Lipid peroxidation was measured through the thiobarbituric acid reactive substances (TBARS) assays. Samples (10  $\mu\text{L}$ ) with ultrapure water (UPW; 70  $\mu\text{L}$ ), 50 mM PBS (50  $\mu\text{L}$ ), 1 mM BHT (2,6-di-tert-butyl-4-methylphenol; 10  $\mu\text{L}$ ), 1.3 % TBA/0.3 % NaOH (75  $\mu\text{L}$ ) and 50 % trichloroacetic acid (50  $\mu\text{L}$ ) were incubated for 2 h at 60 °C. After cool for 15 min on ice, the final reagent was added, the 20 % sodium dodecyl sulphate (10  $\mu\text{L}$ ). Absorbance was measure at  $\lambda$  of 530 nm in a microplate reader and the results express as  $\mu\text{mol}$  of MDA per mg of protein, considering the calibration curve of MDA (concentration range of 2.5 to 100.0  $\mu\text{M}$ ) [8-10].

A colorimetric assay for detection of acetylcholinesterase (AChE) activity was based on an improved *Ellman* method. For the assay 20  $\mu\text{L}$  of samples was used with 120  $\mu\text{L}$  of 0.5 mM DTNB (diluted in 0.05 M tris buffer) and 60  $\mu\text{L}$  of 20 mM iodinated acetylthiocholine and incubated for 5 min at RT. Absorbance was read in a microplate reader at  $\lambda$  of 412 nm at 25 °C for 3 min [11, 12]. The AChE concentration was calculated following the next formula of extinction coefficient ( $\epsilon$ ):

$$\epsilon = \frac{A}{c \times l} \quad (2)$$

where TNB  $\epsilon_{412 \text{ nm}}$  of  $14.1 \times 10^3 \text{ M cm}^{-1}$  ( $14.1 \text{ mL mmol}^{-1} \text{ cm}^{-1}$ ), optical path ( $l$ ) of 0.8 cm, absorbance of sample ( $A$ ) and molar concentration ( $c$ ). AChE concentration ( $\text{mol mL}^{-1}$ ) results were expressed as  $\text{mmol}$  of TNB per mg of protein.

## References

1. Ding J.; Zou H.; Liu Q.; Zhang S.; Razanajatovo R. Bioconcentration of the antidepressant fluoxetine and its effects on the physiological and biochemical status in *Daphnia magna*. *Ecotoxicol Environ Saf* **2017**, *142*, 102-109. Doi: 10.1016/j.ecoenv.2017.03.042.
2. Bradford M. A rapid and sensitive method for the quantitation of microgram quantities of protein utilizing the principle of protein-dye binding. *Anal Biochem* **1976**, *72*, 248-254.
3. Bownik A.; Stepniewska Z.; Skowronski T. Protective effects of ectoine on heat-stressed *Daphnia magna*. *J Comp Physiol B* **2014**, *184*(8), 961-976. Doi: 10.1007/s00360-014-0860-x.
4. Bownik A.; Stepniewska Z. Protective effects of ectoine on behavioral, physiological and biochemical parameters of *Daphnia magna* subjected to hydrogen peroxide. *Comp Biochem Physiol C Toxicol Pharmacol* **2015**, *170*, 38-49. Doi: 10.1016/j.cbpc.2015.02.002.
5. Góth L. A simple method for determination of serum catalase activity and revision of reference range *Clin Chim Acta* **1991**, *196* 143-152.
6. De Felice B.; Salgueiro-González N.; Castiglioni S.; Saino N.; Parolini M. Biochemical and behavioral effects induced by cocaine exposure to *Daphnia magna*. *Sci Total Environ* **2019**, *689*, 141-148. Doi: 10.1016/j.scitotenv.2019.06.383.
7. Deng J.; Yu L.; Liu C.; Yu K.; Shi X.; Yeung L.; Lam P.; Wu R.; Zhou B. Hexabromocyclododecane-induced developmental toxicity and apoptosis in zebrafish embryos. *Aquat Toxicol* **2009**, *93*(1), 29-36. Doi: 10.1016/j.aquatox.2009.03.001.

8. Buege J.; Aust S. Microsomal lipid peroxidation. *Microsomal electron transport and CYT P-450* **1978**, 30, 302-306.
9. Masteling R.; Castro B.; Antunes S.; Nunes B. Whole-organism and biomarker endpoints in *Daphnia magna* show uncoupling of oxidative stress and endocrine disruption in phenolic derivatives. *Ecotoxicol Environ Saf* **2016**, 134, 64-71. Doi: 10.1016/j.ecoenv.2016.08.012.
10. Ohkawa H.; Ohishi N.; Yagi K. Assay for lipid peroxides in animal tissues by thiobarbituric acid reaction *Anal Biochem* **1979**, 95, 351-358.
11. Parolini M.; De Felice B.; Ferrario C.; Salgueiro-González N.; Castiglioni S.; Finizio A.; Tremolada P. Benzoylcegonine exposure induced oxidative stress and altered swimming behavior and reproduction in *Daphnia magna*. *Environ Pollut* **2018**, 232, 236-244. Doi: 10.1016/j.envpol.2017.09.038.
12. Jemec A.; Drobne D.; Tišler T.; Trebše P.; Roš M.; Sepčić K. The applicability of acetylcholinesterase and glutathione S-transferase in *Daphnia magna* toxicity test. *Comp Biochem Physiol C Toxicol Pharmacol* **2007**, 144(4), 303-309. Doi: 10.1016/j.cbpc.2006.10.002.
